# Supplementary material for: Metalloprotease inhibitor TIMP proteins control FGF-2 bioavailability and regulate skeletal growth
Source: PubMed Central journal article supplement (PMC6719459; doi:10.1083/jcb.201906059), 2019-08-01
Supplement: JCB_201906059_sm.pdf [file JCB_201906059_sm.pdf]

## Supplemental material

Saw et al., <https://doi.org/10.1083/jcb.201906059>

Provided online is one table in Excel. Table S1 lists genes significantly altered in TIMPless sternal cartilage.

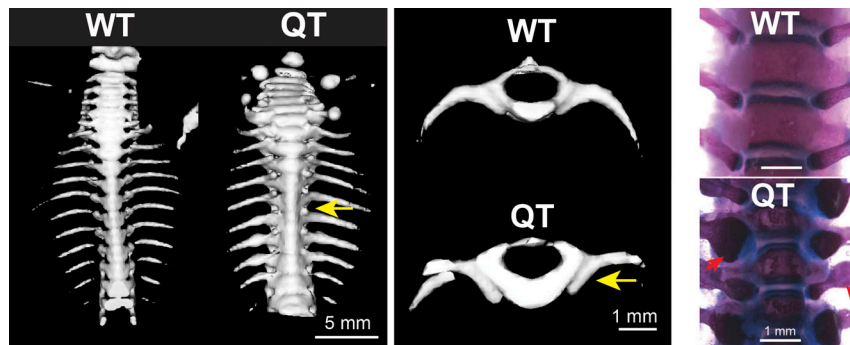

Figure S1. **Bulging of QT ribs at the costovertebral/costotransverse joints.** Faxitron x-ray images of the spine and ribs of 4-wk-old mice. Images show bony enlargements (yellow arrow) of rib in QT mice; coronal (left) and transverse plane (middle). Alcian blue and alizarin red staining showing rib head enlargement (red arrow) at both costovertebral and costotransverse joints in QT mice (right).

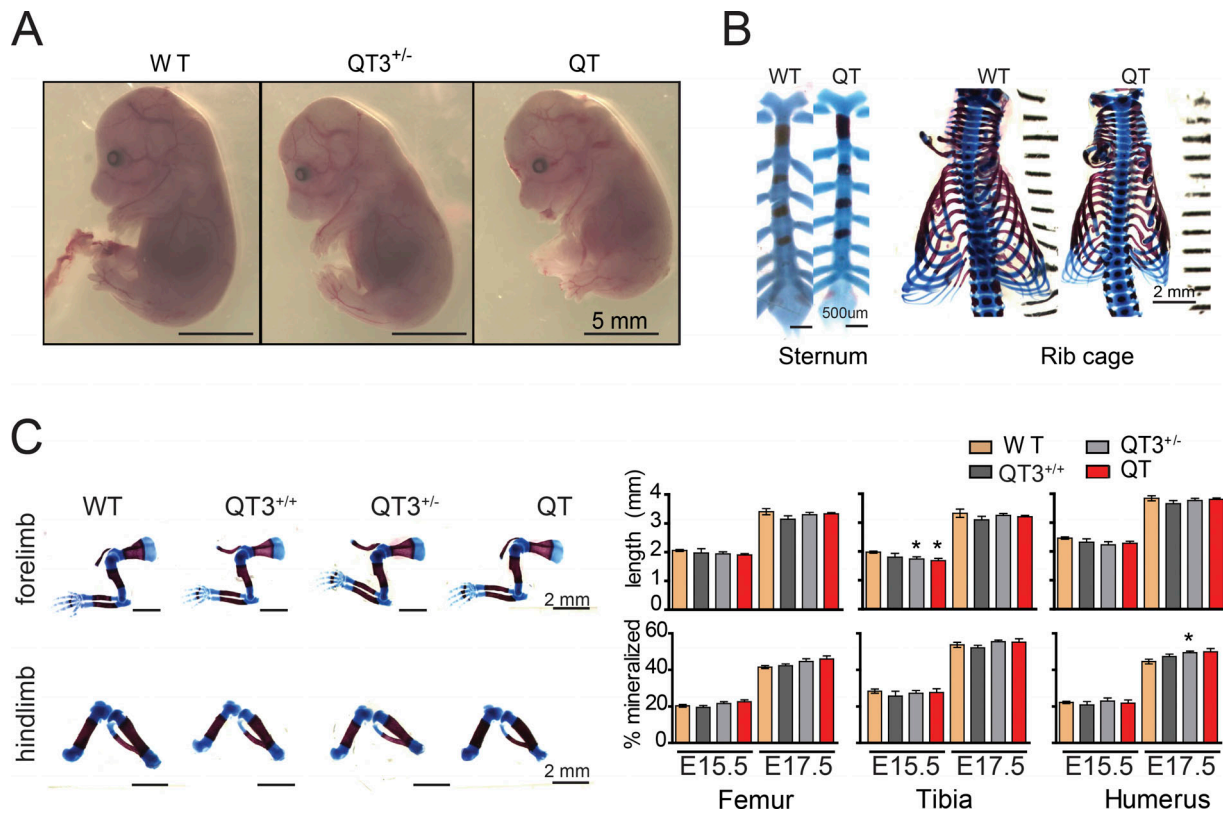

Figure S2. **Embryonic skeletal assessment.** (A) E17.5 WT, QT3<sup>+/-</sup>, and QT embryo (E17.5) display minor differences. (B) Alcian blue- and alizarin red-stained axial skeletons, sternum, and rib cage of WT and QT mice at E15.5. (C) Alcian blue- and alizarin red-stained appendicular bones. Alizarin red indicates degree of mineralization in bone (bottom histogram). Appendicular bone length (top histogram) at E15.5 and E17.5 (WT, *n* = 8–14; QT3<sup>+/-</sup>, *n* = 4–13; QT3<sup>+/-</sup>, *n* = 9–14; QT, *n* = 4–5). Mean values of each dataset are plotted with error bars representing SEM. Data were compared using one-way ANOVA following Dunnett’s multiple comparison, \*, *P* < 0.05 compared with WT.

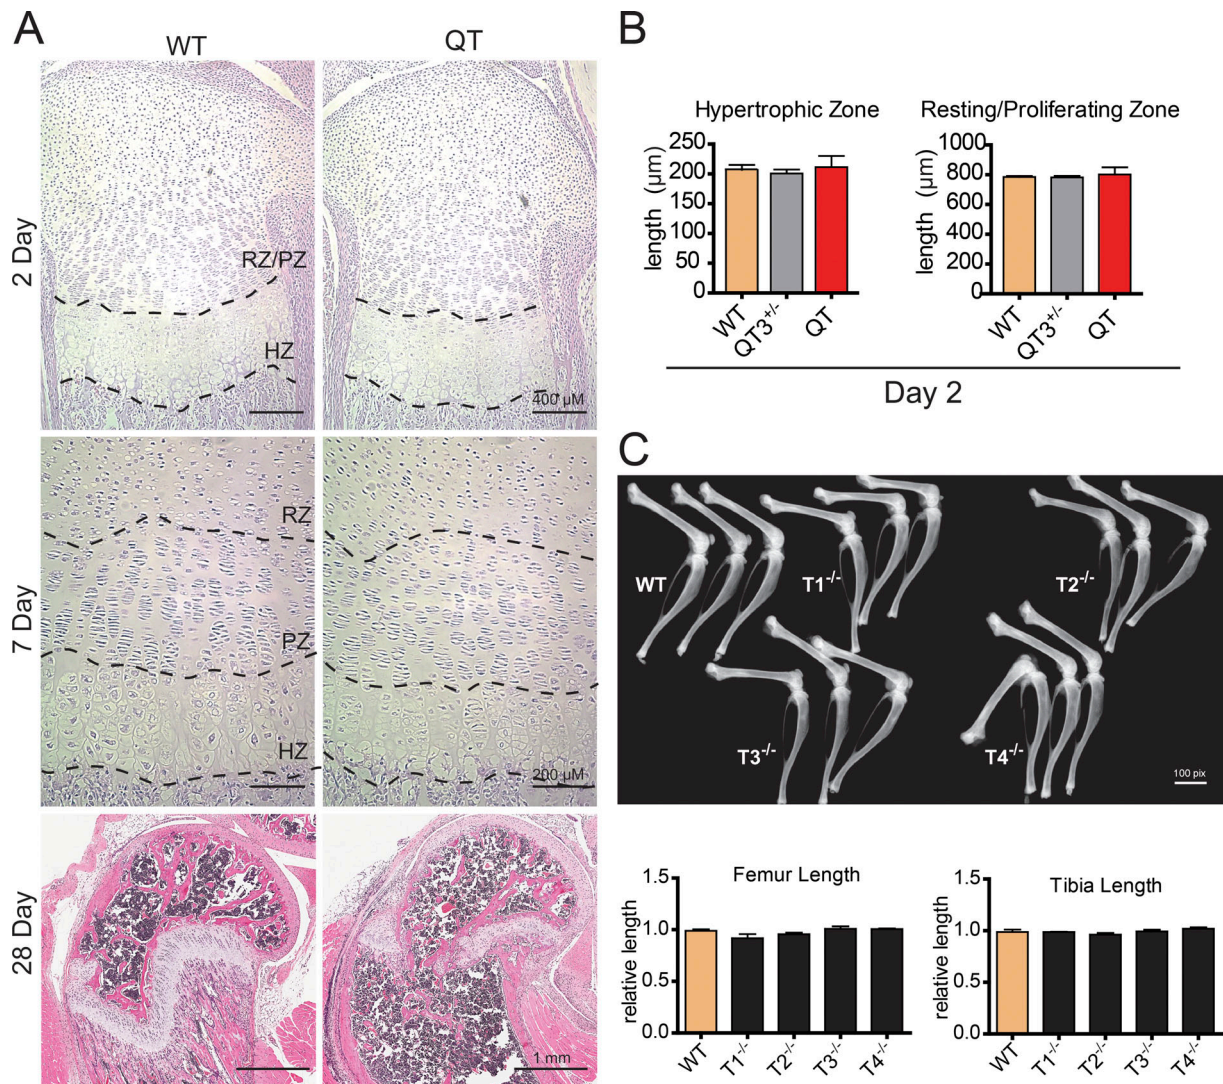

Figure S3. **Postnatal growth plate and long bone assessment.** (A) Images of tibia (day 2; top panel) and femur (day 7, middle panel; day 28, bottom panel) of mice. Black dotted line marks the zones of chondrocyte maturation in GP. Thickness of morphologically delineated resting/proliferating zones (RZ/PZ) and hypertrophic zone (HZ). (B) Quantitative analysis of developmental zones of GP of 2-d-old WT, QT3<sup>-/-</sup>, and QT mouse knee joint, indicating no major abnormality in 2-d-old TIMP-deficient mice. WT, *n* = 5; QT3<sup>-/-</sup>, *n* = 5; and QT, *n* = 3. Mean values of each dataset are plotted with error bars representing SEM. Data were compared using Bonferroni's multiple comparison test. (C) Faxitron images of leg bone of WT mice or mice lacking a single TIMP, as indicated. Quantitative data (lower panel) of femur and tibia length of individual TIMP knockouts indicate that loss of a single TIMP is not sufficient to elicit bone shortening (*n* = 3 each group). Mean values of each dataset are plotted with error bars representing SEM. Data were compared using Bonferroni's multiple comparison test.



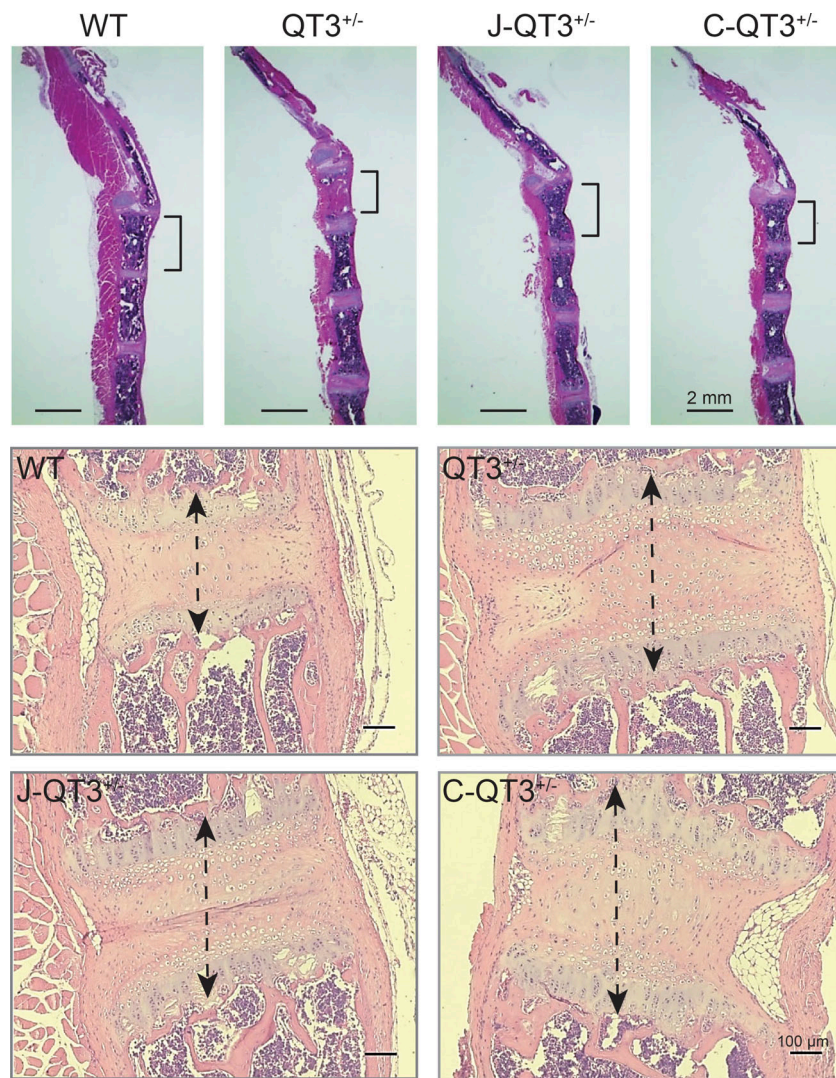

Figure S4. **Sternum shortening in Chloe-QT3<sup>+/-</sup> mice.** H&E-stained sections of sternum from 8-wk-old WT, QT3<sup>+/-</sup>, J-QT3<sup>+/-</sup>, and C-QT3<sup>+/-</sup> mice. Comparison of sternebrae (black brackets in the upper panel) and cartilaginous joints bordered by two growth plates (black dashed lines with arrowheads in the lower panel).

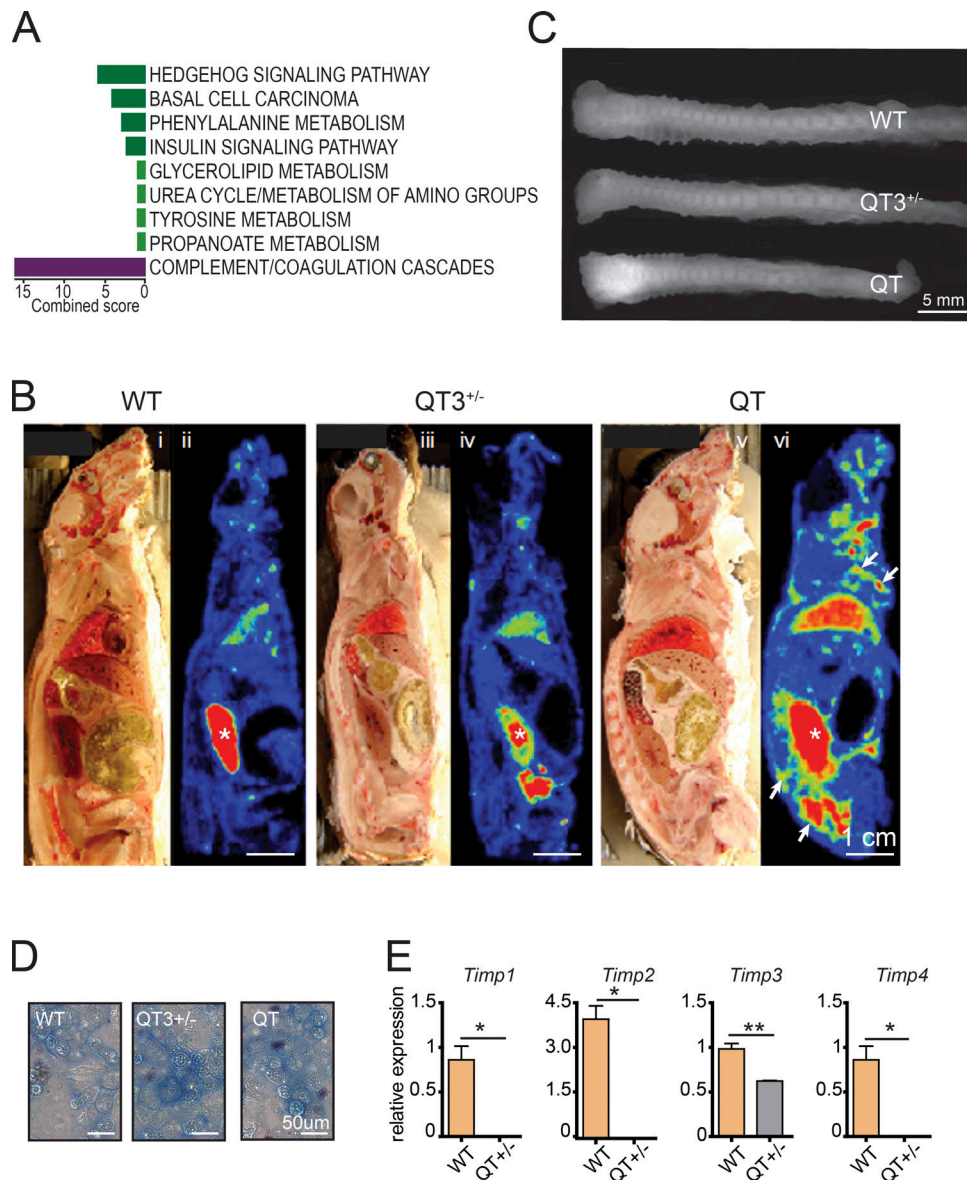

Figure S5. **Imaging of metalloprotease activity.** **(A)** Pathway enrichment using Enrichr showing up-regulated (purple) and down-regulated (blue) pathways in TIMPless sternal cartilage with a combined score  $\geq 1$ . **(B)** Sagittal sections from 12-wk-old mice injected with a radioactive probe  $^3\text{H}$ -217. Bright-field anatomic images (i, iii, and v) and corresponding radioactive signal images (ii, iv, and vi) show MMP activity (blue = low activity, red = high activity). White arrow indicates higher activity in bone, and white asterisk indicates nonspecific signal in kidney due to urinary excretion. **(C)** Ex vivo spines from 4-wk-old mice showing MMPsense750 fluorescent signal (white). A more intense signal indicates higher MMP activity. **(D)** Alcian blue staining of proteoglycan production in 3-d-old primary chondrocyte cultures show functional chondrocytes. **(E)** *Timp* (-1, -2, -3, and -4) gene expression in primary chondrocytes (WT,  $n = 3$ ; QT3<sup>+/-</sup>,  $n = 3$ ). Mean values of each dataset are plotted with error bars representing SEM. Datasets were compared by unpaired t test: \*,  $P < 0.05$ ; \*\*,  $P < 0.01$ .

Table S2. **Key resources**

| <b>Reagent or resource</b>                       | <b>Source</b>                              | <b>Identifier</b> |
|--------------------------------------------------|--------------------------------------------|-------------------|
| <b>Antibodies</b>                                |                                            |                   |
| FGF-2                                            | Abcam                                      | ab8880            |
| Perlecan                                         | Invitrogen                                 | MA5-14641         |
| Goat anti-rabbit                                 | Life Technologies                          | A21245            |
| Goat anti-mouse                                  | Life Technologies                          | A11001            |
| Aggrecan                                         | Abcam                                      | ab3778            |
| <b>Chemicals, peptides, recombinant proteins</b> |                                            |                   |
| TRIzol reagent                                   | Life Technologies                          | 15596018          |
| qScript cDNA SuperMix                            | Quanta Biosciences                         | 84035             |
| TaqMan Gene Expression Master Mix                | Applied Biosystems                         | 4369016           |
| PerfeCTa SYBR Green SuperMix with ROX            | Quanta Biosciences                         | 95055-02K         |
| BB94                                             | Sigma-Aldrich                              | SML0041           |
| TAPI-1                                           | Peptides International                     | NH-3855-PI        |
| Cyclopamine                                      | Selleckchem                                | S1146             |
| AZD4547                                          | Selleckchem                                | S2801             |
| <b>Commercial assays</b>                         |                                            |                   |
| Mouse Gene ST 2.0 chips                          | Affymetrix                                 | 902119            |
| FGF-2 ELISA                                      | Thermo Fisher Scientific                   | EMFGF-2           |
| <b>Experimental models: mouse/cell/explant</b>   |                                            |                   |
| C57BL/6 mice                                     | NA                                         | NA                |
| Chondrocyte primary cell culture (mouse)         | NA                                         | NA                |
| Femoral distal head explant culture (mouse)      | NA                                         | NA                |
| <b>Software and algorithms</b>                   |                                            |                   |
| Limma package (v3.10.3) of Bioconductor          | Open source                                | NA                |
| R statistical environment (v 2.14.2)             | Open source                                | NA                |
| g:Profiler                                       | <a href="#">Reimand et al., 2007</a>       | NA                |
| Enrichr                                          | <a href="#">Chen et al., 2013</a>          | NA                |
| Enrichment map                                   | <a href="#">Merico et al., 2010</a>        | NA                |
| AutoAnnotate                                     | <a href="#">Kucera et al., 2016</a>        | NA                |
| ImageJ                                           | Open source, National Institutes of Health | NA                |

NA, not applicable.

Table S3. Primers used for SYBR Green analysis

| Gene           | Forward primer sequence (5' to 3') | Reverse primer sequence (5' to 3') |
|----------------|------------------------------------|------------------------------------|
| <i>Agg</i>     | GGCTTTCCTGCAGAAGTCAC               | CTGTGCCTCCTCAAATGTCA               |
| <i>Boc</i>     | ACAAGAGGACACACACCACG               | TCACACTCTCGCACCTCGTA               |
| <i>Cdo</i>     | CCAGACCACCCTGAGGATAA               | TGGAATGCATTAAATTGTCGG              |
| <i>Col2a1</i>  | GCAAGATGAGGGCTTCCATA               | CTACGGTGTGAGGGCCAG                 |
| <i>ColXa1</i>  | ACCAGGAATGCCTTGTCTC                | CATAAAGGGCCCACTTGCTA               |
| <i>Cxcl12</i>  | AGGGCACAGTTTGGAGTG                 | GCGCTCTGCATCAGTGAC                 |
| <i>Cxcr4</i>   | ACTCCTTCATCCTTTTGGGG               | TCTGCTCATGGAGTTGAGTG               |
| <i>Fgf2</i>    | GTCACGGAAATACTCCAGTTGGT            | CCCGTTTTGGATCCGAGTTT               |
| <i>Gapdh</i>   | GGGCATCTGGGCTACACTGAG              | CTCTTGCTCAGTGTCTTGCTGG             |
| <i>Gli1</i>    | CTTGTTGGTGGAGTCATTGGA              | GAGGTTGGATGAAGAAGCA                |
| <i>Gli2</i>    | CGAGTGCAACGTTTCCACAG               | GTCAGGTTGCTGTCTACGCT               |
| <i>Hhip</i>    | CTTGTAATTGGGATGGAATGC              | TCAAGGAGCCTTACTTGGACA              |
| <i>Ihh</i>     | TGACAGAGATGGCCAGTGAG               | CAATCCCACATCATCTTCA                |
| <i>Inhba</i>   | GATCATCACCTTTGCCAGT                | TGGTCCTGGTTCTGTTAGCC               |
| <i>Mmp3</i>    | CAGACTTGTCCTCGTTTCCAT              | GGTGCTGACTGCATCAAAGA               |
| <i>Mmp13</i>   | GGTCCTTGGAGTGATCCAGA               | TGATGAAACCTGGACAAGCA               |
| <i>Mmp19</i>   | GCAGCTGTGGCTGGCATTCT               | GCCTGAAGTCATCAGCTCCTT              |
| <i>Pdpm</i>    | CACCTCAGCAACCTCAGAC                | AAGACGCCAATATGATTCCAA              |
| <i>Ptch1</i>   | AATTCTCGACTCACTCGTCCA              | CTCCTCATATTTGGGGCCTT               |
| <i>Sfrp5</i>   | GGAGCACATCTGTTCCATGA               | CTGGACAACGACCTCTGCAT               |
| <i>Timp1</i>   | AGGTGGTCTCGTTGATTTCT               | GTAAGGCCTGTAGCTGTGCC               |
| <i>Timp2</i>   | GAATCCTCTTGATGGGGTTG               | CGTTTTGCAATGCAGACGTA               |
| <i>Timp3</i>   | TAGACCAGAGTGCCAAAGGG               | CCAGGATGCCTTCTGCAAC                |
| <i>Timp4</i>   | GGAGGGGCTGTTTGTACGA                | TCTTTGCTGGCAGGGACTAC               |
| <i>Tnfaip6</i> | ATACAAGCTCACCTACGCCGAA             | ATCCATCCAGCAGCCAGACAT              |

## References

- Chen, E.Y., C.M. Tan, Y. Kou, Q. Duan, Z. Wang, G.V. Meirelles, N.R. Clark, and A. Ma'ayan. 2013. Enrichr: interactive and collaborative HTML5 gene list enrichment analysis tool. *BMC Bioinformatics*. 14:128. <https://doi.org/10.1186/1471-2105-14-128>
- Kucera, M., R. Isserlin, A. Arkhangorodsky, and G.D. Bader. 2016. AutoAnnotate: A Cytoscape app for summarizing networks with semantic annotations. *PLoS Res.* 5:1717. <https://doi.org/10.12688/fl000research.9090.1>
- Merico, D., R. Isserlin, O. Stueker, A. Emili, and G.D. Bader. 2010. Enrichment map: a network-based method for gene-set enrichment visualization and interpretation. *PLoS One*. 5:e13984. <https://doi.org/10.1371/journal.pone.0013984>
- Reimand, J., M. Kull, H. Peterson, J. Hansen, and J. Vilo. 2007. g:Profiler--a web-based toolset for functional profiling of gene lists from large-scale experiments. *Nucleic Acids Res.* 35:W193–W200. <https://doi.org/10.1093/nar/gkm226>
